# Supplementary material for: Ethnomedicinal plants used for snakebite treatments in Ethiopia: a comprehensive overview
Source: PubMed Central journal article supplement (PMC6682375; doi:10.1590/1678-9199-jvatitd-2019-0017), 2019-08-05
Supplement: 1678-9199-jvatitd-25-e20190017-s1.pdf [file 1678-9199-jvatitd-25-e20190017-s1.pdf]

## Supplementary Material to “Ethnomedicinal plants used for snakebite treatments in Ethiopia: a comprehensive overview”

**Additional file 1.** Scientific name, habit, part used, method of preparation, route of administration and applications of ethnomedicinal plants employed for snakebite treatment in Ethiopia.

| Family         | Species                          | Habit | Part used   | Preparation                              | Traditional therapeutic use         | Comments                          | Reference |
|----------------|----------------------------------|-------|-------------|------------------------------------------|-------------------------------------|-----------------------------------|-----------|
| Acanthaceae    | <i>Barleria eranthemoides</i>    | Shrub | Root        | Crushed and mixed with water             | Oral route                          |                                   | 90        |
| Acanthaceae    | <i>Justicia betonica</i>         | Herb  | Root        | Crushed and mixed with water             | Oral route                          | Veterinary use                    | 91        |
| Acanthaceae    | <i>Justicia schimperiana</i>     | Shrub | Leaves      |                                          | Oral route                          | Veterinary use                    | 92        |
| Acanthaceae    | <i>Ruellia patula</i>            | Herb  | Root        | Chewed and swallowed                     | Oral route                          |                                   | 93        |
| Aizoaceae      | <i>Zaleya pentandra</i>          | Herb  | Leaves      | Crushed                                  | Local application                   |                                   | 94        |
| Aizoaceae      | <i>Zaleya pentandra</i>          | Herb  | Root        | Crushed and mixed with water             | Nasal route                         |                                   | 94        |
| Aizoaceae      | <i>Trianthema portulacastrum</i> | Herb  | Whole plant |                                          | Nasal route                         |                                   | 95        |
| Alliaceae      | <i>Allium sativum</i>            | Herb  | Bulb        | Crushed to paste                         | Local application                   |                                   | 96        |
| Aloaceae       | <i>Aloe harlana</i>              | Shrub | Leaves      | Crushed and mixed with water             | Oral route                          |                                   | 97        |
| Aloaceae       | <i>Aloe megalacantha</i>         | Shrub | Whole plant | Crushed to juice                         | Oral route                          |                                   | 98        |
| Aloaceae       | <i>Aloe megalacantha</i>         | Shrub | Whole plant | Crushed to juice; chewed and swallowed   | Oral route                          |                                   | 99        |
| Aloaceae       | <i>Aloe pirottae</i>             | Shrub | Leaves      | Decoction                                | Oral route                          | Associated with other ingredients | 100       |
| Aloaceae       | <i>Aloe</i> spp.                 | Shrub | Root        |                                          |                                     | Veterinary use                    | 101       |
| Aloaceae       | <i>Aloe trichosantha</i>         | Shrub | Root        |                                          | Oral and nasal routes; body wash    |                                   | 95        |
| Amaranthaceae  | <i>Achyranthes aspera</i>        | Herb  | Root        | Chewed and swallowed                     | Oral route                          |                                   | 98        |
| Amaranthaceae  | <i>Achyranthes aspera</i>        | Herb  | Root        | Chewed and swallowed                     | Oral route                          |                                   | 99        |
| Amaranthaceae  | <i>Aerva javanica</i>            | Shrub | Root        | Burned to charcoal and mixed with butter | Local application                   |                                   | 94        |
| Amaranthaceae  | <i>Aerva javanica</i>            | Shrub | Root        | Chewed and swallowed                     | Oral route                          |                                   | 102       |
| Amaranthaceae  | <i>Cyatula cylindrica</i>        | Herb  |             |                                          |                                     |                                   | 103       |
| Amaryllidaceae | <i>Crinum abyssinicum</i>        | Herb  | Root        | Crushed                                  | Local application                   |                                   | 54        |
| Anacardiaceae  | <i>Operculicarya gummifera</i>   | Tree  |             |                                          | Oral route                          | Also veterinary use               | 104       |
| Anacardiaceae  | <i>Rhus natalensis</i>           | Shrub | Leaves      | Chewed and swallowed                     | Oral route                          |                                   | 105; 106  |
| Anacardiaceae  | <i>Rhus natalensis</i>           | Shrub | Leaves      |                                          | Oral route; local application       |                                   | 95        |
| Apiaceae       | <i>Heteromorpha arborescens</i>  | Shrub | Root        | Chewed and swallowed                     | Oral route; application on the neck |                                   | 107       |
| Apocynaceae    | <i>Acokanthera schimperi</i>     | Tree  | Whole plant | Fumigation                               |                                     | Used as snake killer              | 57        |
| Apocynaceae    | <i>Acokanthera schimperi</i>     | Tree  | Leaves      |                                          |                                     |                                   | 51        |
| Apocynaceae    | <i>Carissa edulis</i>            | Shrub | Root        | Infusion                                 | Oral route                          | Veterinary use                    | 108       |
| Apocynaceae    | <i>Carissa spinarum</i>          | Tree  | Root        | Chewed and swallowed                     | Oral route                          |                                   | 90        |

| Family           | Species                           | Habit   | Part used    | Preparation                                    | Traditional therapeutic use   | Comments                                                        | Reference |
|------------------|-----------------------------------|---------|--------------|------------------------------------------------|-------------------------------|-----------------------------------------------------------------|-----------|
| Apocynaceae      | <i>Carissa spinarum</i>           | Tree    | Leaves       | Fumigation                                     |                               | Use as snake repellent                                          | 109       |
| Apocynaceae      | <i>Carissa spinarum</i>           | Tree    | Root         |                                                | Oral route                    |                                                                 | 46        |
| Apocynaceae      | <i>Carissa spinarum</i>           | Tree    | Root         | Powdered and mixed with water                  | Poured in snake's hole        | Used as repellent                                               | 110       |
| Apocynaceae      | <i>Calotropis procera</i>         | Tree    | Root         | Chewed and swallowed                           | Oral route                    |                                                                 | 111       |
| Apocynaceae      | <i>Calotropis procera</i>         | Tree    | Root; leaves | Crushed to juice                               | Oral route; local application |                                                                 | 53        |
| Apocynaceae      | <i>Carissa carandas</i>           | Shrub   | Leaves       | Chopped and mixed with water                   | Oral route                    |                                                                 | 104       |
| Apocynaceae      | <i>Carissa spinarum</i>           | Tree    | Leaves       | Chewed and swallowed                           | Oral route                    |                                                                 | 93        |
| Apocynaceae      | <i>Carissa spinarum</i>           | Tree    | Leaves       | Chewed and swallowed                           | Oral route                    |                                                                 | 112       |
| Apocynaceae      | <i>Carissa spinarum</i>           | Tree    | Root         | Chewed and swallowed                           | Oral route                    |                                                                 | 113       |
| Apocynaceae      | <i>Dregea schimperi</i>           | Climber | Root         | Crushed and mixed with water                   | Oral route                    | Veterinary use                                                  | 114       |
| Apocynaceae      | <i>Echidnopsis dammaniana</i>     | Herb    | Stem         | Crushed                                        | Local application             |                                                                 | 97        |
| Apocynaceae      | <i>Echidnopsis dammaniana</i>     | Shrub   | Stem         | Crushed and mixed with water; crushed to paste | Local application             | Veterinary use                                                  | 115       |
| Apocynaceae      | <i>Echidnopsis dammaniana</i>     | Shrub   | Leaves       | Crushed and mixed with water                   | Oral route; local application |                                                                 | 116       |
| Apocynaceae      | <i>Pergularia daemia</i>          | Climber | Root         |                                                | Local application             |                                                                 | 117       |
| Apocynaceae      | <i>Pergularia tomentosa</i>       | Herb    |              |                                                | Oral, nasal and ear routes    |                                                                 | 95        |
| Apocynaceae      | <i>Sarcostemma andongense</i>     | Herb    | Leaves       | Leaf juice                                     | Oral route                    | Veterinary use                                                  | 115       |
| Araliaceae       | <i>Schefflera abyssinica</i>      | Tree    | Stem; bark   | Water infusion                                 | Oral route                    |                                                                 | 93        |
| Aristolochiaceae | <i>Aristolochia bracteolata</i>   | Climber | Root         |                                                | Oral route                    |                                                                 | 95        |
| Asclepiadaceae   | <i>Pergularia daemia</i>          | Climber | Root         |                                                | Local application             | Applied after wound incisions                                   | 118       |
| Asparagaceae     | <i>Albuca abyssinica</i>          | Herb    | Root         | Crushed and mixed with water                   | Oral route                    | Veterinary use                                                  | 119       |
| Asteraceae       | <i>Echinops kerebicho</i>         | Herb    |              | Fumigation                                     |                               | Use as repellent                                                | 40        |
| Asteraceae       | <i>Vernonia adoensis</i>          | Shrub   | Root         | Decoction                                      | Oral route                    | Associated with <i>Catha edulis</i>                             | 54        |
| Asteraceae       | <i>Vernonia bipontini</i>         | Shrub   | Root         | Crushed and filtered                           | Oral route                    |                                                                 | 98        |
| Asteraceae       | <i>Cirsium englerianum</i>        | Herb    |              | Crushed and mixed with water                   | Oral route                    |                                                                 | 49        |
| Asteraceae       | <i>Echinops kerebicho</i>         | Herb    | Root         | Fumigation                                     |                               | Used as repellent                                               | 120       |
| Asteraceae       | <i>Galinsoga quadriradiata</i>    | Herb    | Leaves       |                                                | Local application             |                                                                 | 121       |
| Asteraceae       | <i>Guizotia scabra</i>            | Shrub   | Root         | Crushed and mixed with water                   | Oral route                    | Associated with <i>Acacia brevispica</i> and <i>Ficus vasta</i> | 48        |
| Asteraceae       | <i>Gymnanthemum amygdalinum</i>   | Tree    | Root         | Chewed and swallowed                           | Oral route                    |                                                                 | 50        |
| Asteraceae       | <i>Gymnanthemum auriculiferum</i> | Shrub   |              | Crushed and mixed with water                   | Oral route                    |                                                                 | 122       |
| Asteraceae       | <i>Kleinia odora</i>              | Shrub   | Whole plant  | Fumigation                                     |                               | Used as repellent                                               | 50        |

| Family          | Species                         | Habit | Part used     | Preparation                                          | Traditional therapeutic use              | Comments                                                                         | Reference |
|-----------------|---------------------------------|-------|---------------|------------------------------------------------------|------------------------------------------|----------------------------------------------------------------------------------|-----------|
| Asteraceae      | <i>Vernonia adoensis</i>        | Shrub | Root          | Crushed and mixed with water or chewed and swallowed | Oral route                               |                                                                                  | 107       |
| Asteraceae      | <i>Vernonia adoensis</i>        | Shrub | Root          | Crushed and mixed with water                         | Oral route                               |                                                                                  | 123       |
| Asteraceae      | <i>Vernonia auriculifera</i>    | Shrub | Root          | Crushed and mixed with water                         | Oral route                               | Also veterinary use                                                              | 49        |
| Bignoniaceae    | <i>Stereospermum kunthianum</i> | Tree  | Stem; bark    | Chewed and swallowed                                 | Oral route; local application            | Use for snakebite and scorpion sting                                             | 93        |
| Bignoniaceae    | <i>Stereospermum kunthianum</i> | Tree  | Root; bark    |                                                      | Oral route; local application            | Use for snakebite and scorpion sting                                             | 124       |
| Bignoniaceae    | <i>Stereospermum kunthianum</i> | Tree  | Root          | Root powder mixed with water and swallowed           | Oral route                               | Veterinary use; associated with <i>Calpurnia aurea</i>                           | 120       |
| Bignoniaceae    | <i>Tecomaria capensis</i>       | Tree  | Root          | Crushed and mixed with water                         | Oral and nasal route                     |                                                                                  | 53        |
| Boraginaceae    | <i>Helotropium rariflorum</i>   | Herb  | Whole plant   | Crushed and mixed with water                         | Body wash                                | Associated with unidentified plant                                               | 94        |
| Burseraceae     | <i>Boswellia papyrifera</i>     | Tree  | Root; latex   | Fumigation                                           |                                          | Associated with <i>Calotropis procera</i> ; also veterinary use; snake repellent | 53        |
| Burseraceae     | <i>Commiphora myrrha</i>        | Tree  | Stem          | Crushed                                              | Oral route; local application            | Anti-hemorrhagic and healing effects; used as snake repellent                    | 125       |
| Burseraceae     | <i>Commiphora myrrha</i>        | Tree  | Resine        | Chewed and swallowed                                 | Oral route                               |                                                                                  | 126       |
| Burseraceae     | <i>Commiphora myrrha</i>        | Tree  | Whole plant   | Fumigation                                           |                                          | Used as repellent                                                                | 126       |
| Cactaceae       | <i>Opuntia ficus-indica</i>     | Shrub | Stem          | Crushed                                              | Oral route                               |                                                                                  | 127       |
| Campanulaceae   | <i>Monopsis stellarioides</i>   | Herb  | Leaves        |                                                      | Oral route                               |                                                                                  | 109       |
| Capparaceae     | <i>Boscia coriacea</i>          | Shrub | Fruit; leaves |                                                      | Oral route; local application            |                                                                                  | 95        |
| Capparaceae     | <i>Cadaba glandulosa</i>        | Shrub | Root; leaves  |                                                      | Oral and nasal routes; local application |                                                                                  | 95        |
| Capparaceae     | <i>Cadaba rotundifolia</i>      | Shrub | Leaves        |                                                      | Local application                        |                                                                                  | 95        |
| Capparaceae     | <i>Maerua pseudopetalosa</i>    | Tree  | Root          | Cuttet and mixed with water                          | Oral route                               | Used for snake and scorpion envenoming; also used as repellent                   | 128       |
| Caricaceae      | <i>Carica papaya</i>            | Tree  | Seeds         | Crushed and boiled with coffee                       | Oral route                               | Associated with honey                                                            | 126       |
| Caryophyllaceae | <i>Silene macrosolen</i>        | Herb  | Root          | Fumigation                                           |                                          | Used as snake repellent                                                          | 129       |
| Caryophyllaceae | <i>Silene macrosolen</i>        | Herb  | Root          | Fumigation                                           |                                          | Used as snake repellent                                                          | 98        |
| Caryophyllaceae | <i>Silene macrosolen</i>        | Herb  | Root          | Fumigation                                           | Nasal route                              |                                                                                  | 130       |
| Combretaceae    | <i>Terminalia brownii</i>       | Tree  | Bark          |                                                      | Oral route; local application            |                                                                                  | 109       |
| Combretaceae    | <i>Terminalia laxiflora</i>     | Tree  | Root          | No preparation                                       | Local application                        |                                                                                  | 54        |
| Convolvulaceae  | <i>Ipomoea kituensis</i>        | Herb  | Root          | Crushed and mixed with water                         | Oral route                               |                                                                                  | 53        |

| Family         | Species                        | Habit   | Part used    | Preparation                         | Traditional therapeutic use      | Comments                                           | Reference |
|----------------|--------------------------------|---------|--------------|-------------------------------------|----------------------------------|----------------------------------------------------|-----------|
| Convolvulaceae | <i>Seddera hirsuta</i>         | Herb    | Leaves       | No preparation                      | Local application                |                                                    | 94        |
| Convolvulaceae | <i>Seddera hirsuta</i>         | Herb    | Leaves       | Crushed and mixed with water        | Oral route; local application    |                                                    | 94        |
| Convolvulaceae | <i>Seddera bagshawei</i>       | Herb    | Leaves       |                                     | Oral and nasal routes; body wash |                                                    | 95        |
| Convolvulaceae | <i>Seddera hirsuta</i>         | Herb    | Stem         |                                     | Oral route                       |                                                    | 95        |
| Cucurbitaceae  | <i>Coccinia grandis</i>        | Climber | Root         | Crushed to powder                   | Local application                |                                                    | 131       |
| Cucurbitaceae  | <i>Cucumis dipsaceus</i>       | Herb    | Root; leaves | Crushed to juice                    | Oral route; local application    |                                                    | 53        |
| Cucurbitaceae  | <i>Cucumis dipsaceus</i>       | Herb    | Root         |                                     |                                  |                                                    | 51        |
| Cucurbitaceae  | <i>Cucumis ficifolius</i>      | Climber | Root         | Grind and mixed with honey          | Oral route                       | Used for snake and spider bites and scorpion sting | 98        |
| Cucurbitaceae  | <i>Lagenaria siceraria</i>     | Climber | Leaves       | Crushed                             | Oral route                       |                                                    | 132       |
| Cucurbitaceae  | <i>Cucumis dipsaceus</i>       | Herb    | Root         | Crushed                             | Oral route                       |                                                    | 100       |
| Cucurbitaceae  | <i>Cucumis ficifolius</i>      | Climber | Root         | Chewed and swallowed                | Oral route                       |                                                    | 50        |
| Cucurbitaceae  | <i>Cucumis ficifolius</i>      | Climber | Root         | Crushed and mixed with water        | Oral route                       |                                                    | 133       |
| Cucurbitaceae  | <i>Cucumis ficifolius</i>      | Climber | Root         | Chewed and swallowed only the juice | Oral route                       |                                                    | 96        |
| Cucurbitaceae  | <i>Momordica trifoliolata</i>  | Climber | Leaves       | Powdered                            | Local application                |                                                    | 100       |
| Cucurbitaceae  | <i>Cucumis ficifolius</i>      | Climber | Root         | Swallowed                           | Oral route                       |                                                    | 118       |
| Cyperaceae     | <i>Cyperus</i> spp.            |         | Root         | Crushed and mixed with water        | Oral route                       | Associated with garlic                             | 123       |
| Dioscoreaceae  | <i>Dioscorea praehensilis</i>  | Climber | Seeds        | Crushed and mixed with water        | Oral route                       |                                                    | 128       |
| Ebenaceae      | <i>Euclea racemosa</i>         | Shrub   | Leaves       | Crushed and mixed with water        | Oral route                       | Associated with <i>Aloe</i> spp.                   | 97        |
| Ebenaceae      | <i>Euclea racemosa</i>         | Shrub   | Root; bark   | Crushed and mixed with water        | Oral route                       |                                                    | 98        |
| Ebenaceae      | <i>Euclea racemosa</i>         | Shrub   | Root; bark   | Crushed and mixed with water        | Oral route                       |                                                    | 99        |
| Euphorbiaceae  | <i>Acalypha</i> spp.           |         | Leaves       | Crushed and mixed with water        | Oral and nasal routes            |                                                    | 94        |
| Euphorbiaceae  | <i>Acalypha indica</i>         | Herb    | Leaves       |                                     | Oral and nasal routes            | Veterinary use                                     | 95        |
| Euphorbiaceae  | <i>Acalypha indica</i>         | Herb    | Whole plant  |                                     | Oral and nasal routes; body wash |                                                    | 95        |
| Euphorbiaceae  | <i>Claoxylopsis andapensis</i> | Shrub   | Bark; leaves | Chopped and mixed with water        | Oral route                       |                                                    | 104       |
| Euphorbiaceae  | <i>Croton macrostachyus</i>    | Tree    | Leaves       | Leaf juice                          | Local application                |                                                    | 129       |
| Euphorbiaceae  | <i>Croton macrostachyus</i>    | Tree    | Root         | Chewed and swallowed                | Oral route                       |                                                    | 107       |
| Euphorbiaceae  | <i>Croton macrostachyus</i>    | Tree    | Root         |                                     | Oral route                       |                                                    | 121       |
| Euphorbiaceae  | <i>Croton macrostachyus</i>    | Tree    | Leaves       |                                     | Oral route                       |                                                    | 46        |
| Euphorbiaceae  | <i>Croton macrostachyus</i>    | Tree    | Root         | Crushed, mixed with water           | Oral route                       |                                                    | 123       |

| Family        | Species                        | Habit | Part used          | Preparation                   | Traditional therapeutic use   | Comments                                                                                 | Reference |
|---------------|--------------------------------|-------|--------------------|-------------------------------|-------------------------------|------------------------------------------------------------------------------------------|-----------|
| Euphorbiaceae | <i>Croton macrostachyus</i>    | Tree  | Leaves             | Leaf juice                    | Local application             |                                                                                          | 130       |
| Euphorbiaceae | <i>Phyllanthus ovalifolius</i> | Shrub | Root               | Chewed and swallowed          | Oral route                    |                                                                                          | 102       |
| Fabaceae      | <i>Acacia abyssinica</i>       | Tree  | Root               | Crushed                       | Oral route                    | Associated with <i>Nicotiana tabacum</i>                                                 | 132       |
| Fabaceae      | <i>Acacia brevispica</i>       | Tree  | Root; bark         | Crushed                       | Oral route                    | Associated with <i>Guizotia scabra</i> , <i>Ficus vasta</i> and <i>Nicotiana tabacum</i> | 48        |
| Fabaceae      | <i>Acacia etbaica</i>          | Tree  | Root; bark         | Chewed and swallowed          | Oral route                    |                                                                                          | 90        |
| Fabaceae      | <i>Acacia mearnsii</i>         | Tree  | Stem; bark         | Chewed and swallowed          | Oral route                    |                                                                                          | 90        |
| Fabaceae      | <i>Acacia mellifera</i>        | Tree  | Root; leaves       | Crushed and mixed with water  | Oral route                    |                                                                                          | 131       |
| Fabaceae      | <i>Acacia nilotica</i>         | Tree  | Root               | Crushed to paste              | Oral and nasal route          | Veterinary use                                                                           | 108       |
| Fabaceae      | <i>Acacia tortilis</i>         | Shrub | Leaves             | Crushed to juice              | Oral route; local application |                                                                                          | 53        |
| Fabaceae      | <i>Calpurnia aurea</i>         | Tree  | Leaves             | Crushed to juice; decoction   | Oral route                    | Also veterinary use                                                                      | 134       |
| Fabaceae      | <i>Calpurnia aurea</i>         | Tree  | Root; stem; leaves | Crushed and mixed with water  | Oral route                    | Veterinary use                                                                           | 91        |
| Fabaceae      | <i>Calpurnia aurea</i>         | Tree  | Root               | Crushed and mixed with water  | Oral route                    | Veterinary use                                                                           | 103       |
| Fabaceae      | <i>Calpurnia aurea</i>         | Tree  | Leaves             | Crushed and mixed with water  | Body wash                     | Veterinary use                                                                           | 52        |
| Fabaceae      | <i>Calpurnia aurea</i>         | Tree  | Leaves             | Mixed with milk               |                               |                                                                                          | 135       |
| Fabaceae      | <i>Delonix elata</i>           | Tree  | Root               | Chewed and swallowed          | Oral route                    |                                                                                          | 133       |
| Fabaceae      | <i>Dichrostachys cinerea</i>   | Tree  | Bark               | Chewed and swallowed          | Oral route                    |                                                                                          | 136       |
| Fabaceae      | <i>Ficus ovata</i>             | Tree  | Bark               | Crushed                       |                               | Associated with <i>Calotropis procera</i>                                                | 53        |
| Fabaceae      | <i>Indigofera arrecta</i>      | Herb  | Leaves             | No preparation                | Local application             |                                                                                          | 54        |
| Fabaceae      | <i>Indigofera oblongifolia</i> | Shrub | Root               |                               | Oral route; local application | Used for scorpion stings                                                                 | 95        |
| Fabaceae      | <i>Indigofera</i> spp.         |       | Whole plant        | Crushed and mixed with water  | Oral route; local application |                                                                                          | 94        |
| Fabaceae      | <i>Indigofera</i> spp.         |       | Whole plant        | Crushed                       | Local application             |                                                                                          | 95        |
| Fabaceae      | <i>Lotus corniculatus</i>      | Herb  | Root               | Powdered and mixed with water | Oral route                    | Associated with tea                                                                      | 52        |
| Fabaceae      | <i>Pterocarpus lucens</i>      | Tree  |                    | Crushed and mixed with water  | Oral route                    |                                                                                          | 123       |
| Fabaceae      | <i>Senna didymobotrya</i>      | Shrub | Root; leaves       | Crushed and mixed with water  | Oral route                    |                                                                                          | 48        |
| Fabaceae      | <i>Senna italica</i>           | Herb  | Leaves             | Crushed                       | Local application             |                                                                                          | 94        |
| Fabaceae      | <i>Senna italica</i>           | Herb  | Whole plant        | Crushed and mixed with water  | Oral route; local application |                                                                                          | 94        |
| Fabaceae      | <i>Senna obtusifolia</i>       | Shrub | Root               | Crushed                       | Local application             |                                                                                          | 100       |
| Fabaceae      | <i>Senna obtusifolia</i>       | Shrub | Root               | Crushed                       | Local application             |                                                                                          | 136       |
| Fabaceae      | <i>Senna petersiana</i>        | Shrub | Root               | Crushed and mixed with water  | Oral route                    |                                                                                          | 133       |
| Fabaceae      | <i>Senna septemtrionalis</i>   | Shrub | Leaves             | Crushed and mixed with water  | Oral route                    |                                                                                          | 52        |

| Family         | Species                       | Habit   | Part used    | Preparation                                  | Traditional therapeutic use              | Comments                                     | Reference |
|----------------|-------------------------------|---------|--------------|----------------------------------------------|------------------------------------------|----------------------------------------------|-----------|
| Fabaceae       | <i>Stylosanthes fruticosa</i> | Herb    | Root         |                                              | Oral route                               |                                              | 109       |
| Fabaceae       | <i>Calpurnia aurea</i>        | Tree    | Leaves       | Smashed and swallowed                        | Oral route                               |                                              | 120       |
| Fabaceae       | <i>Indigofera arrecta</i>     | Herb    | Root         | Chewed and swallowed                         | Oral route                               |                                              | 107       |
| Fabaceae       | <i>Indigofera articulata</i>  | Herb    | Root         |                                              | Oral route                               |                                              | 95        |
| Fabaceae       | <i>Indigofera brevicalyx</i>  | Herb    | Root         | Chewed and swallowed                         | Oral route                               |                                              | 93        |
| Fabaceae       | <i>Indigofera costata</i>     | Shrub   | Root         | Chewed and swallowed                         | Oral route                               |                                              | 137       |
| Fabaceae       | <i>Indigofera spicata</i>     | Herb    | Root         | Chewed and swallowed                         | Oral route                               |                                              | 93        |
| Fabaceae       | <i>Senna alexandrina</i>      | Shrub   | Leaves       |                                              | Oral and nasal routes; local application |                                              | 95        |
| Francoaceae    | <i>Bersama abyssinica</i>     | Shrub   | Stem bark    |                                              | Oral route; local application            |                                              | 109       |
| Hypericaceae   | <i>Hypericum quartianum</i>   | Shrub   | Root         | Crushed and mixed with water                 | Oral route                               | Veterinary use                               | 103       |
| Iridaceae      | <i>Lapeirousia schimperi</i>  | Herb    | Root         | Root is chewed and spit to the animal's nose | Nasal route                              | Veterinary use                               | 119       |
| Lamiaceae      | <i>Leonotis ocymifolia</i>    | Shrub   | Leaves       | Powdered                                     | Oral route                               |                                              | 132       |
| Lamiaceae      | <i>Leucas</i> spp.            |         | Leaves       | Crushed and mixed with water                 | Nasal route                              |                                              | 94        |
| Lamiaceae      | <i>Leucas zeylanica</i>       | Herb    | Stem; leaves | Burned to ash                                | Local application                        |                                              | 128       |
| Lamiaceae      | <i>Salvia nilotica</i>        | Herb    | Root         | Crushed and mixed with water                 | Oral route                               |                                              | 53        |
| Lamiaceae      | <i>Leonotis ocymifolia</i>    | Shrub   | Root         | Crushed in paste                             | Local application                        |                                              | 107       |
| Lamiaceae      | <i>Ocimum spicatum</i>        | Herb    | Root         |                                              | Oral route                               |                                              | 95        |
| Lamiaceae      | <i>Plectranthus globosus</i>  | Herb    | Leaves       | Chopped and mixed with water                 | Oral route                               | Associated with <i>Alectra sessiliflora</i>  | 104       |
| Lamiaceae      | <i>Thymus schimperi</i>       | Herb    | Whole plant  |                                              | Oral route; local application            |                                              | 95        |
| Liliaceae      | <i>Gloriosa superba</i>       | Herb    | Root         |                                              | Oral route                               |                                              | 110       |
| Malvaceae      | <i>Abutilon mauritanium</i>   | Shrub   | Root         | Crushed and boiled                           | Oral route                               |                                              | 110       |
| Malvaceae      | <i>Gossypium herbaceum</i>    | Shrub   | Root         | Chewed and swallowed                         | Oral route                               |                                              | 118       |
| Malvaceae      | <i>Abutilon bidentatum</i>    | Shrub   | Root         | Crushed to paste                             | Local application                        | Veterinary use                               | 115       |
| Malvaceae      | <i>Gossypium arboretum</i>    | Shrub   | Root         |                                              |                                          |                                              | 138       |
| Malvaceae      | <i>Gossypium barbadense</i>   | Shrub   | Root         | Chewed and swallowed                         | Oral route; application on the neck      |                                              | 107       |
| Malvaceae      | <i>Gossypium herbaceum</i>    | Shrub   | Root         | Chewed and swallowed                         | Oral route                               | Non-specific detoxifying action              | 50        |
| Malvaceae      | <i>Gossypium herbaceum</i>    | Shrub   | Root         | Chewed and swallowed                         | Oral route                               |                                              | 117       |
| Malvaceae      | <i>Malva verticillata</i>     | Herb    | Leaves       | Crushed and applied                          | Local application                        |                                              | 57        |
| Meliaceae      | <i>Ekebergia capensis</i>     | Tree    | Stem; bark   | Crushed and mixed with water                 | Oral route                               |                                              | 90        |
| Meliantaceae   | <i>Bersama abyssinica</i>     | Tree    | Buds         |                                              | Oral route                               | Associated with <i>Brucea antidysentrica</i> | 46        |
| Menispermaceae | <i>Stephania abyssinica</i>   | Climber | Root         | Chewed and swallowed                         | Oral route                               |                                              | 112       |

| Family         | Species                      | Habit   | Part used          | Preparation                                  | Traditional therapeutic use   | Comments                                                              | Reference |
|----------------|------------------------------|---------|--------------------|----------------------------------------------|-------------------------------|-----------------------------------------------------------------------|-----------|
| Menispermaceae | <i>Cocculus pendulus</i>     | Shrub   | Root               |                                              | Oral route                    |                                                                       | 95        |
| Moraceae       | <i>Ficus sycomorus</i>       | Tree    | Latex              | Powdered                                     | Oral route                    | Associated with <i>Acacia abyssinica</i>                              | 132       |
| Moraceae       | <i>Ficus sycomorus</i>       | Tree    | Root; stem; bark   | Chewed and swallowed                         | Oral route                    | Used for snakebite and scorpion sting                                 | 123       |
| Moraceae       | <i>Ficus vasta</i>           | Tree    | Latex              |                                              | Oral route                    | Associated with <i>Acacia abyssinica</i>                              | 132       |
| Moraceae       | <i>Ficus vasta</i>           | Tree    | Root               | Crushed                                      | Oral route                    | Associated with <i>Acacia brevispica</i> and <i>Nicotiana tabacum</i> | 48        |
| Moringaceae    | <i>Moringa oleifera</i>      | Tree    | Root; bark         |                                              | Oral route; local application |                                                                       | 95        |
| Myrtaceae      | <i>Syzygium guineense</i>    | Tree    | Fruit              | Crushed                                      | Local application             |                                                                       | 132       |
| Olacaceae      | <i>Ximenia caffra</i>        | Tree    | Leaves             | Chewed 7 leaves and swallowed only the juice | Oral route                    |                                                                       | 96        |
| Oleaceae       | <i>Jasminum grandiflorum</i> | Shrub   | Root               | Crushed and boiled in water                  | Oral route                    |                                                                       | 133       |
| Oleaceae       | <i>Jasminum abyssinicum</i>  | Climber | Root               | Crushed and mixed with water                 | Oral route                    |                                                                       | 107       |
| Oleaceae       | <i>Jasminum abyssinicum</i>  | Climber | Leaves             | Chewed and swallowed                         | Oral route                    |                                                                       | 113       |
| Oleaceae       | <i>Olea europaea</i>         | Tree    | Leaves             | Fumigation                                   | Nasal route                   |                                                                       | 139       |
| Oleaceae       | <i>Olea europaea</i>         | Tree    | Stem               |                                              | Oral route; local application |                                                                       | 95        |
| Onagraceae     | <i>Ludwigia abyssinica</i>   | Herb    | Root; stem         |                                              | Local application             | Associated with other plants                                          | 104       |
| Pedaliaceae    | <i>Sesamum indicum</i>       | Herb    | Root               | Crushed and mixed with milk                  | Oral route                    |                                                                       | 53        |
| Penaecaceae    | <i>Olinia rochetiana</i>     | Tree    | Latex              | Crushed to paste                             | Local application             |                                                                       | 140       |
| Phyllanthaceae | <i>Andrachne aspera</i>      | Herb    | Root               | Chewed and swallowed                         | Oral route                    | Induce vomiting                                                       | 40        |
| Phyllanthaceae | <i>Andrachne aspera</i>      | Herb    | Root               | Chewed and swallowed                         | Oral route                    |                                                                       | 90        |
| Phyllanthaceae | <i>Phyllanthus sepialis</i>  | Shrub   | Root; stem; leaves | Crushed and mixed with water                 | Oral route                    | Veterinary use                                                        | 91        |
| Phytolaccaceae | <i>Phytolacca dodecandra</i> | Climber | Leaves             | Squeezed and swallowed                       | Oral route                    | Prevention; associated with honey                                     | 93        |
| Plantaginaceae | <i>Plantago lanceolata</i>   | Herb    | Seeds              | Dry or mixed with water                      | Oral route                    |                                                                       | 141       |
| Plumbaginaceae | <i>Plumbago zeylanica</i>    | Shrub   | Root bark          |                                              | Local application             |                                                                       | 109       |
| Plumbaginaceae | <i>Plumbago zeylanica</i>    | Shrub   | Leaves             | Chewed and swallowed                         | Oral route                    |                                                                       | 118       |
| Plumbaginaceae | <i>Plumbago auriculata</i>   | Climber | Leaves             | Chopped, mixed with water to paste           | Body wash                     | Also veterinary use                                                   | 104       |
| Plumbaginaceae | <i>Plumbago zeylanica</i>    | Herb    | Root               | Crushed in powder                            | Local application             |                                                                       | 93        |
| Plumbaginaceae | <i>Plumbago zeylanica</i>    | Herb    | Leaves             | Chewed and swallowed                         | Oral route                    |                                                                       | 117       |
| Poaceae        | <i>Cynodon dactylon</i>      | Herb    | Aerial parts       | Crushed and mixed with butter                | Local application             |                                                                       | 134       |
| Poaceae        | <i>Cynodon dactylon</i>      | Herb    | Aerial parts       |                                              | Local application             | Rubbed to the affected skin                                           | 120       |
| Poaceae        | <i>Cynodon dactylon</i>      | Herb    | Aerial parts       | Chewed and swallowed                         | Oral route                    |                                                                       | 107       |

| Family        | Species                         | Habit   | Part used           | Preparation                         | Traditional therapeutic use                     | Comments                                                          | Reference |
|---------------|---------------------------------|---------|---------------------|-------------------------------------|-------------------------------------------------|-------------------------------------------------------------------|-----------|
| Poaceae       | <i>Cynodon dactylon</i>         | Herb    | Stem                | Crushed                             | Local application                               |                                                                   | 132       |
| Poaceae       | <i>Cynodon dactylon</i>         | Herb    | Root                | Decoction                           | Oral route                                      |                                                                   | 131       |
| Poaceae       | <i>Cynodon dactylon</i>         | Herb    | Whole plant         |                                     | Oral route                                      |                                                                   | 46        |
| Poaceae       | <i>Cynodon nlemfuensis</i>      | Herb    | Whole plant; leaves | Leaves are pounded and swallowed    | Oral route (leaves) and body wash (whole plant) | Associated with <i>Calpurnia aurea</i>                            | 120       |
| Poaceae       | <i>Eleusine floccifolia</i>     | Herb    | Aerial parts        | Crushed to paste                    | Local application                               |                                                                   | 140       |
| Poaceae       | <i>Hyparrhenia hirta</i>        | Herb    | Whole plant         | Chopped and mixed with water        | Oral route                                      | Also veterinary use                                               | 104       |
| Poaceae       | <i>Setaria megaphylla</i>       | Herb    | Leaves              | Crushed                             | Nasal route; body wash                          | Veterinary use                                                    | 91        |
| Polygalaceae  | <i>Polygala abyssinica</i>      | Herb    | Root                | Chewed and swallowed                | Oral route                                      |                                                                   | 90        |
| Polygalaceae  | <i>Polygala abyssinica</i>      | Herb    | Root                | Chewed and swallowed                | Oral route                                      |                                                                   | 112       |
| Polygalaceae  | <i>Polygala abyssinica</i>      | Herb    | Root                | Chewed and swallowed                | Oral route                                      |                                                                   | 98        |
| Polygalaceae  | <i>Polygala obtusissima</i>     | Herb    | Whole plant         | Crushed and mixed with water        | Oral route; local application                   |                                                                   | 94        |
| Polygalaceae  | <i>Polygala abyssinica</i>      | Herb    | Root                | Chewed and swallowed                | Oral route                                      |                                                                   | 50        |
| Polygalaceae  | <i>Polygala sphenoptera</i>     | Herb    | Root                | Chewed and swallowed                | Oral route                                      |                                                                   | 93        |
| Polygonaceae  | <i>Rumex nervosus</i>           | Shrub   | Leaves              | Chewed and swallowed                | Oral route                                      |                                                                   | 111       |
| Polygonaceae  | <i>Rumex nervosus</i>           | Shrub   | Root                | Chewed and swallowed                | Oral route                                      | Non-specific detoxifying action                                   | 50        |
| Primulaceae   | <i>Maesa lanceolata</i>         | Tree    | Leaves              | Crushed to juice                    | Local application                               |                                                                   | 131       |
| Primulaceae   | <i>Maesa lanceolata</i>         | Tree    | Leaves              | Chewed and swallowed                | Oral route                                      |                                                                   | 113       |
| Proteaceae    | <i>Faurea rochetiana</i>        | Tree    | Leaves              |                                     | Local application                               |                                                                   | 46        |
| Ranunculaceae | <i>Delphinium dasycaulon</i>    | Herb    | Root; leaves        | Leaf and root juice                 | Oral route                                      |                                                                   | 90        |
| Ranunculaceae | <i>Thalictrum rhynchocarpum</i> | Herb    | Root                |                                     | Oral route                                      |                                                                   | 46        |
| Ranunculaceae | <i>Clematis hirsute</i>         | Climber | Root                | Crushed to juice                    | Oral route                                      |                                                                   | 53        |
| Rhamnaceae    | <i>Ziziphus spina-christi</i>   | Tree    | Root; leaves        | Fumigation                          |                                                 | Used as snake repellent                                           | 90        |
| Rhamnaceae    | <i>Ziziphus abyssinica</i>      | Shrub   |                     | Mixed with water                    |                                                 |                                                                   | 142       |
| Rhamnaceae    | <i>Ziziphus spina-christi</i>   | Tree    | Bark                |                                     | Oral route                                      |                                                                   | 95        |
| Rosaceae      | <i>Prunus persica</i>           | Tree    |                     | Crushed and mixed with water        | Oral route                                      |                                                                   | 97        |
| Rubiaceae     | <i>Pentas schimperi</i>         | Shrub   | Root                | Chewed and swallowed only the juice | Oral route                                      |                                                                   | 96        |
| Rubiaceae     | <i>Pavetta gardeniifolia</i>    | Shrub   | Leaves              |                                     | Oral route                                      |                                                                   | 47        |
| Rubiaceae     | <i>Pentas lanceolata</i>        | Herb    | Root                | Crushed and mixed with water        | Oral route                                      | Veterinary use                                                    | 91        |
| Rubiaceae     | <i>Pentas schimperi</i>         | Shrub   |                     | Chewed and swallowed                | Oral route                                      |                                                                   | 113       |
| Rubiaceae     | <i>Rubia cordifolia</i>         | Climber | Root; leaves        | Crushed and mixed with water        | Oral route                                      |                                                                   | 105; 106  |
| Rutaceae      | <i>Ruta chalepensis</i>         | Shrub   | Leaves              | Infusion                            | Oral route                                      | Used for pain relief; associated with <i>Artemisia absinthium</i> | 34        |



| Family           | Species                             | Habit   | Part used          | Preparation                                  | Traditional therapeutic use   | Comments                                                              | Reference |
|------------------|-------------------------------------|---------|--------------------|----------------------------------------------|-------------------------------|-----------------------------------------------------------------------|-----------|
| Rutaceae         | <i>Clausena anisata</i>             | Tree    | Leaves             |                                              | Local application             |                                                                       | 139       |
| Rutaceae         | <i>Clausena anisata</i>             | Shrub   | Leaves             | Crushed and mixed with water                 | Oral route                    |                                                                       | 52        |
| Salicaceae       | <i>Dovyalis caffra</i>              | Shrub   | Root               | chewed and sprayed                           | Local application             |                                                                       | 143       |
| Scrophulariaceae | <i>Verbascum sinaiticum</i>         | Herb    | Root               | Chewed and swallowed                         | Oral route                    |                                                                       | 90        |
| Scrophulariaceae | <i>Alonsoa acutifolia</i>           | Shrub   | Root               | Chopped and mixed with water                 | Oral route                    | Associated with <i>Plectranthus glandulosus</i> ; also veterinary use | 104       |
| Scrophulariaceae | <i>Barthlottia madagascariensis</i> | Herb    |                    | Concoction                                   | Oral route                    |                                                                       | 104       |
| Simaroubaceae    | <i>Brucea antidysenterica</i>       | Shrub   | Fruit              | Mixed with honey                             | Oral route                    |                                                                       | 135       |
| Smilacaceae      | <i>Smilax aspera</i>                | Climber | Leaves             | Crushed and mixed with water                 | Oral route                    | Veterinary use                                                        | 114       |
| Solanaceae       | <i>Nicotiana tabacum</i>            | Shrub   |                    | No preparation                               |                               | Used as repellent                                                     | 34        |
| Solanaceae       | <i>Datura metel</i>                 | Herb    | Whole plant        |                                              | Oral route; local application |                                                                       | 109       |
| Solanaceae       | <i>Datura metel</i>                 | Herb    | Leaves             | Crushed to juice                             | Oral route                    |                                                                       | 144       |
| Solanaceae       | <i>Nicotiana tabacum</i>            | Shrub   | Root               | Chewed or crushed                            | Local application             |                                                                       | 50        |
| Solanaceae       | <i>Nicotiana tabacum</i>            | Shrub   | Leaves             | Crushed and mixed with water                 | Oral route; local application |                                                                       | 139       |
| Solanaceae       | <i>Nicotiana tabacum</i>            | Shrub   | Leaves             | Powdered                                     | Oral route                    |                                                                       | 132       |
| Solanaceae       | <i>Nicotiana tabacum</i>            | Shrub   | Leaves             | Chewed and swallowed                         | Oral route                    |                                                                       | 126       |
| Solanaceae       | <i>Nicotiana tabacum</i>            | Shrub   | Whole plant        | Fumigation                                   |                               | Used as repellent                                                     | 126       |
| Solanaceae       | <i>Nicotiana tabacum</i>            | Shrub   | Bark; leaves       | Infusion                                     | Oral route                    |                                                                       | 48        |
| Solanaceae       | <i>Nicotiana tabacum</i>            | Shrub   | Leaves             | Powdered and mixed with water                | Oral route; local application |                                                                       | 52        |
| Solanaceae       | <i>Solanum incanum</i>              | Shrub   | Fruit              |                                              | Oral route                    | Veterinary use                                                        | 120       |
| Solanaceae       | <i>Solanum incanum</i>              | Shrub   | Fruit; leaves      | Rubbed                                       | Local application             |                                                                       | 143       |
| Solanaceae       | <i>Solanum incanum</i>              | Shrub   | Fruit              |                                              | Local application             |                                                                       | 133       |
| Solanaceae       | <i>Solanum incanum</i>              | Shrub   | Root               | Chewed and swallowed                         | Oral route                    |                                                                       | 90        |
| Solanaceae       | <i>Solanum incanum</i>              | Shrub   | Root               | Root is chewed and spit to the animal's nose | Nasal route                   | Veterinary use                                                        | 119       |
| Solanaceae       | <i>Solanum incanum</i>              | Shrub   | Root               |                                              | Oral route                    |                                                                       | 47        |
| Solanaceae       | <i>Solanum incanum</i>              | Shrub   | Root               | No preparation                               | Oral route                    |                                                                       | 131       |
| Solanaceae       | <i>Solanum incanum</i>              | Shrub   | Leaves             | Crushed to juice                             | Oral route                    |                                                                       | 144       |
| Solanaceae       | <i>Solanum jubae</i>                | Shrub   | Root; fruit; seeds | Crushed to powder                            | Local application             | Veterinary use                                                        | 115       |
| Solanaceae       | <i>Solanum marginatum</i>           | Herb    | Fruit              | No preparation                               | Oral route                    | Veterinary use                                                        | 134       |
| Solanaceae       | <i>Solanum</i> spp.                 | Shrub   | Root               | Chewed and swallowed                         | Oral route                    |                                                                       | 137       |
| Solanaceae       | <i>Withania somnifera</i>           | Shrub   | Root               | Chewed and swallowed                         | Oral route                    |                                                                       | 105; 106  |
| Solanaceae       | <i>Withania somnifera</i>           | Shrub   | Root               | Crushed and mixed with water                 | Oral route                    |                                                                       | 53        |
| Sterculiaceae    | <i>Dombeya torrida</i>              | Tree    | Bark               | Crushed to powder                            | Local application             |                                                                       | 140       |
| Sterculiaceae    | <i>Sterculia setigera</i>           | Tree    | Root; leaves       | Crushed to juice                             | Oral route; local application |                                                                       | 53        |
| Verbenaceae      | <i>Clerodendrum</i>                 | Shrub   | Stem               | Burned                                       | Applied hot                   |                                                                       | 98        |

| Family         | Species                         | Habit   | Part used    | Preparation                           | Traditional therapeutic use   | Comments                                | Reference |
|----------------|---------------------------------|---------|--------------|---------------------------------------|-------------------------------|-----------------------------------------|-----------|
|                | <i>myricoides</i>               |         |              |                                       | locally                       |                                         |           |
| Verbenaceae    | <i>Clerodendrum myricoides</i>  | Shrub   | Stem         | Burned                                | Applied hot locally           |                                         | 99        |
| Verbenaceae    | <i>Cyclonema myricoides</i>     | Herb    | Bark         | Crushed to powder                     |                               |                                         | 57        |
| Verbenaceae    | <i>Priva adhaerens</i>          | Herb    | Root         | Decoction                             | Oral route                    |                                         | 131       |
| Verbenaceae    | <i>Verbena officinalis</i>      | Herb    | Root         | Chewed and swallowed                  | Oral route                    |                                         | 50        |
| Verbenaceae    | <i>Verbena officinalis</i>      | Herb    | Root         | Chewed and swallowed                  | Oral route                    |                                         | 117       |
| Verbenaceae    | <i>Verbena officinalis</i>      | Herb    | Root         | Chewed and swallowed                  | Oral route                    |                                         | 118       |
| Verbenaceae    | <i>Verbena officinalis</i>      | Herb    | Leaves       | Crushed and mixed with water          | Oral route                    | Also veterinary use                     | 104       |
| Vitaceae       | <i>Cyphostemma junceum</i>      | Climber | Root         | Powdered                              | Oral route                    | Used to prevent snakebite               | 54        |
| Vitaceae       | <i>Cissus adenaucalis</i>       | Climber | Root         | Crushed to paste                      | Oral route                    | Veterinary use                          | 108       |
| Vitaceae       | <i>Cissus aphylla</i>           | Climber | Root         | Crushed                               | Oral route; local application | Veterinary use                          | 133       |
| Vitaceae       | <i>Cissus petiolata</i>         | Climber | Stem; leaves |                                       |                               |                                         | 51        |
| Vitaceae       | <i>Cyphostemma acaulata</i>     | Climber |              | Mixed with oil and water              |                               |                                         | 145       |
| Vitaceae       | <i>Cyphostemma adenocaula</i>   | Climber | Root         | Chewed and swallowed                  | Oral route                    | Non-specific detoxifying action         | 50        |
| Vitaceae       | <i>Cyphostemma adenocaula</i>   | Climber | Leaves       | Leave pounded to paste                | Body wash                     | Used to prevent snakebite               | 140       |
| Vitaceae       | <i>Cyphostemma adenocaula</i>   | Climber | Root         | Crushed and filtered                  | Oral route                    |                                         | 98        |
| Vitaceae       | <i>Cyphostemma adenocaula</i>   | Climber | Root         | Crushed and filtered                  | Tied on the body              | Used as repellent                       | 98        |
| Vitaceae       | <i>Cyphostemma adenocaula</i>   | Climber | Root         | Crushed and filtered                  | Oral route                    |                                         | 99        |
| Vitaceae       | <i>Cyphostemma burgeri</i>      | Herb    | Root         |                                       | Oral route                    |                                         | 95        |
| Vitaceae       | <i>Cyphostemma cyphopetalum</i> | Climber | Root; stem   | Chewed and swallowed                  | Oral route                    |                                         | 113       |
| Vitaceae       | <i>Cyphostemma junceum</i>      | Climber | Root         | Chewed and swallowed                  | Oral route                    |                                         | 117       |
| Vitaceae       | <i>Cyphostemma junceum</i>      | Climber | Root; bark   | Crushed to paste and mixed with honey | Oral route                    |                                         | 98        |
| Vitaceae       | <i>Cyphostemma junceum</i>      | Climber | Root; bark   | Crushed to paste and mixed with honey | Oral route                    |                                         | 99        |
| Vitaceae       | <i>Cyphostemma junceum</i>      | Climber | Root         | Chewed and swallowed                  | Oral route                    | Also veterinary use (local application) | 118       |
| Vitaceae       | <i>Cyphostemma oxyphyllum</i>   | Climber | Root; leaves |                                       | Oral route                    | Associated with honey                   | 98        |
| Vitaceae       | <i>Rhoicissus tridentata</i>    | Climber | Root         | Chewed and swallowed                  | Oral route                    | Human and veterinary use                | 50        |
| Zygophyllaceae | <i>Balanites aegyptiaca</i>     | Tree    | Root         | Crushed and mixed with water          | Oral route                    |                                         | 133       |
| Zygophyllaceae | <i>Balanites aegyptiaca</i>     | Tree    | Root         | Crushed and mixed with water          | Oral route; local application |                                         | 100       |
